# Supplementary material for: Myricitrin – a flavonoid isolated from the Indian olive tree (Elaeocarpus floribundus) – inhibits Monoamine oxidase in the brain and elevates striatal dopamine levels: therapeutic implications against Parkinson's disease
Source: Royal Society of Chemistry journal article supplement (doi:10.1039/d2fo00734g), 2022-01-01
Supplement: d2fo00734g1.pdf [file d2fo00734g1.pdf]

## Supplementary File

### **Myricitrin – a flavonoid isolated from Indian olive tree (*Elaeocarpus floribundus*) inhibits Monoamine oxidase in brain and elevates striatal dopamine levels: therapeutic implications against Parkinson's disease**

Chayan Banerjee<sup>1,3</sup>, Sumangal Nandy<sup>1</sup>, Joy Chakraborty<sup>1,3\*</sup>, Deepak Kumar<sup>2,3\*</sup>

<sup>1</sup>Department of Cell Biology and Physiology, CSIR-Indian Institute of Chemical Biology-TRUE campus, Kolkata, India

<sup>2</sup>Organic and Medicinal Chemistry Division, CSIR-Indian Institute of Chemical Biology, Jadavpur, Kolkata, India

<sup>3</sup>Academy of Scientific and Innovative Research (AcSIR), CSIR- Human Resource Development Centre, Ghaziabad, India.

\*Co-corresponding author

joy.chakraborty@iicb.res.in, deepak@iicb.res.in

## Spectroscopic characterization

### *Myricitrin (1)*: (myricetin 3-*O*-rhamnoside)

UV,  $\lambda_{\text{max}}$  nm 257, 360;  $m/z$  319.0539  $[M-146+H]^+$ , 465.1073  $[M+H]^+$ , 487.0903  $[M+Na]^+$ ;  $^1\text{H-NMR}$  ( $\text{CD}_3\text{OD}$ ),  $\delta_{\text{H}}$  6.91 (2H, s, H-2', H-6'), 6.32 (1H, *d*,  $J = 1.8$  Hz, H-8), 6.16 (1H, *d*,  $J = 1.8$  Hz, H-6), 5.28 (1H, s, H-1''), 4.19 (1H, brs, H-2''), 3.76 (1H, *dd*, 3.0, 9.6 Hz, H-3''), 3.48 (1H, *m*, H-4''), 3.27 (1H, brs, H-5''), 0.93 (3H, *d*, 6 Hz);  $^{13}\text{C}$  NMR ( $\text{CD}_3\text{OD}$ ):  $\delta_{\text{C}}$  179.6 (C-4), 165.8 (C-7), 163.1 (C-5), 159.4 (C-9), 158.4 (C-2), 146.8 (C-3', C-5'), 137.8 (C-4'), 136.3 (C-3), 121.9 (C-1'), 109.5 (C-2', C-6'), 105.8 (C-10), 103.6 (C-1''), 99.8 (C-6), 94.7 (C-8), 73.3 (C-4''), 72.1 (C-3''), 72.0 (C-2''), 71.8 (C-5''), 17.6 (C-6''). The compound was identified as myricitrin by comparing the spectroscopic data with those reported in the literature.<sup>1,2</sup>

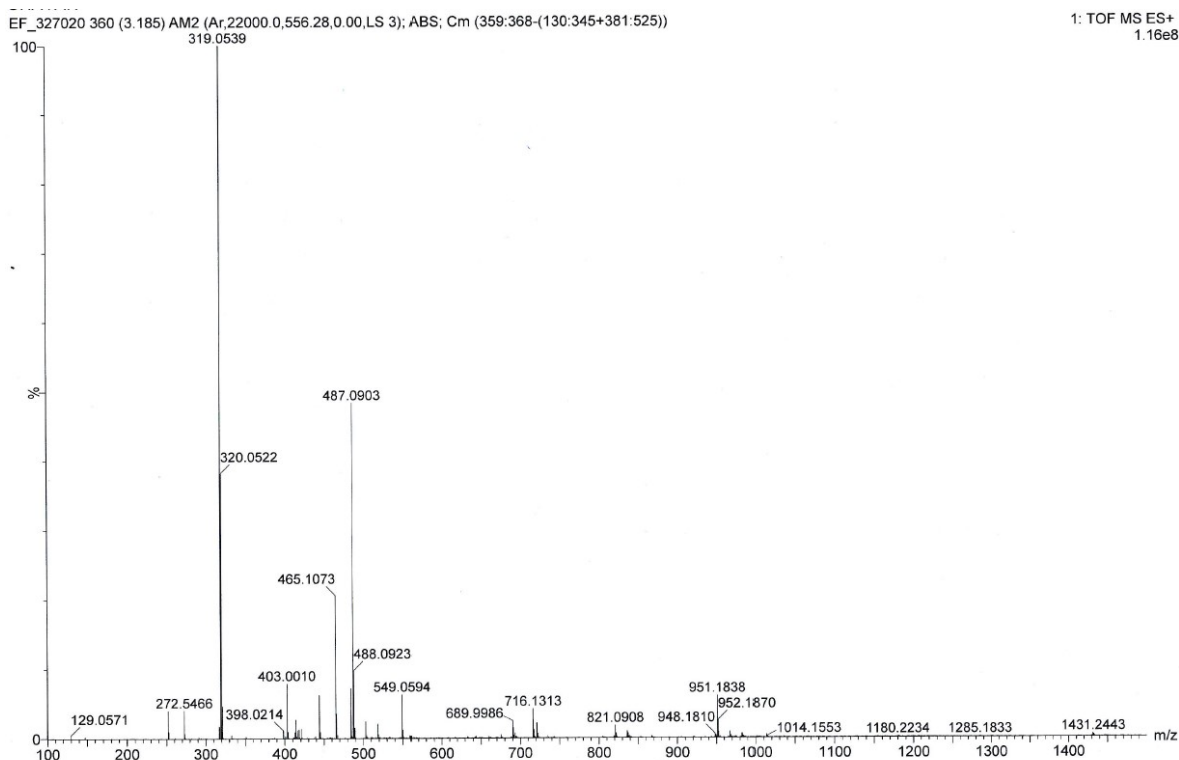

**Fig. S1:** ESI-MS (+ve) spectrum of myricitrin (**1**).

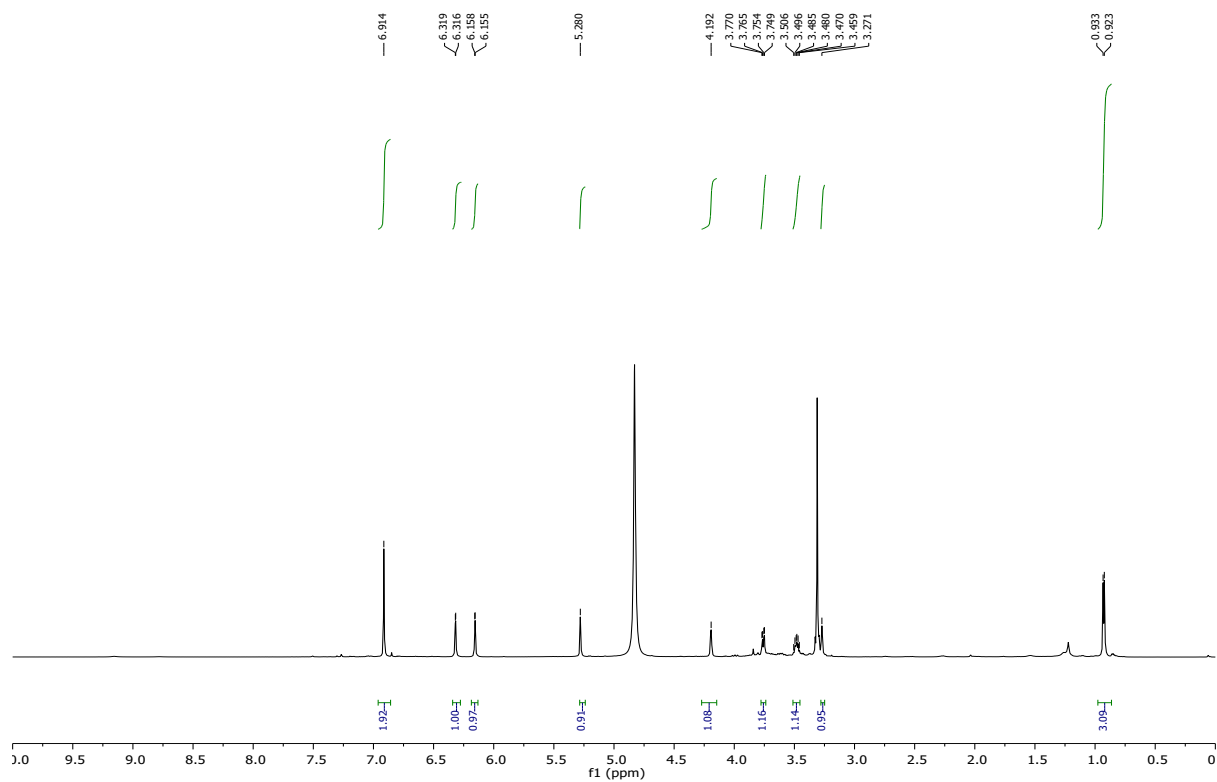

**Fig. S2:**  $^1\text{H}$ -NMR of myricitrin (**1**) in MeOD, 600 MHz.

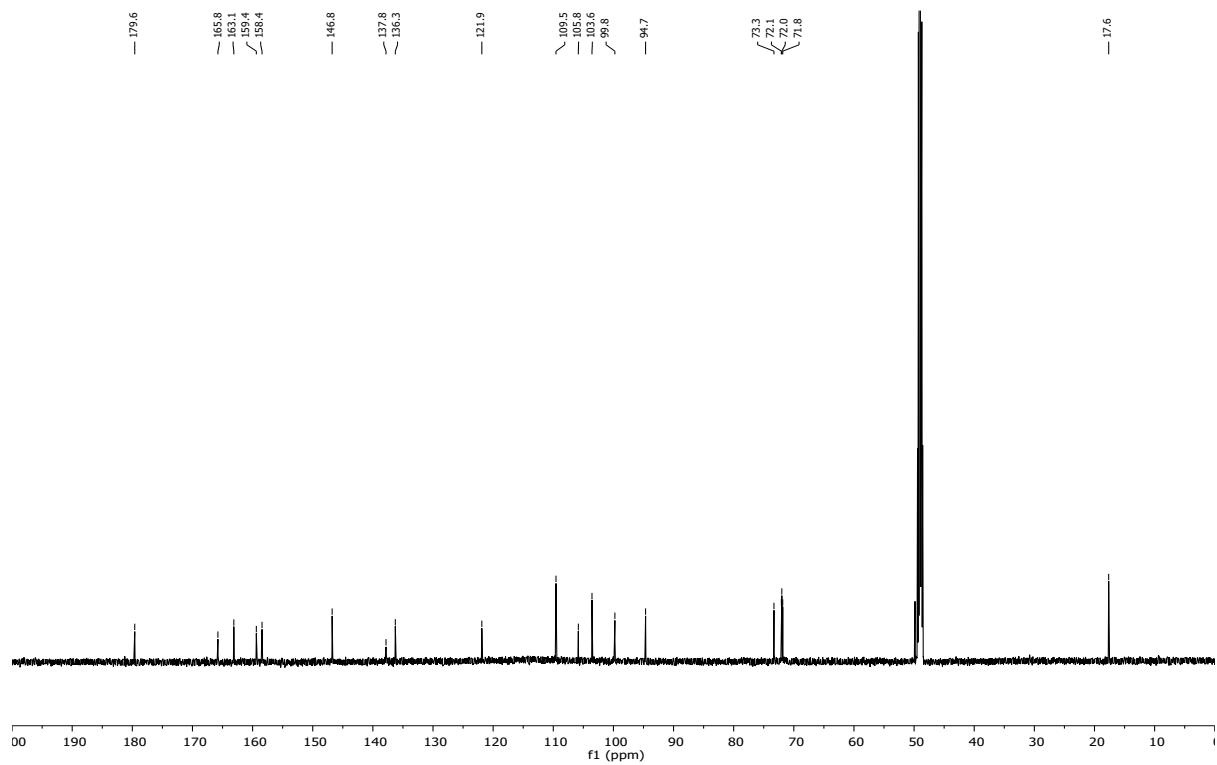

**Fig. S3:**  $^{13}\text{C}$ -NMR of myricitrin (**1**) in MeOD, 150 MHz.

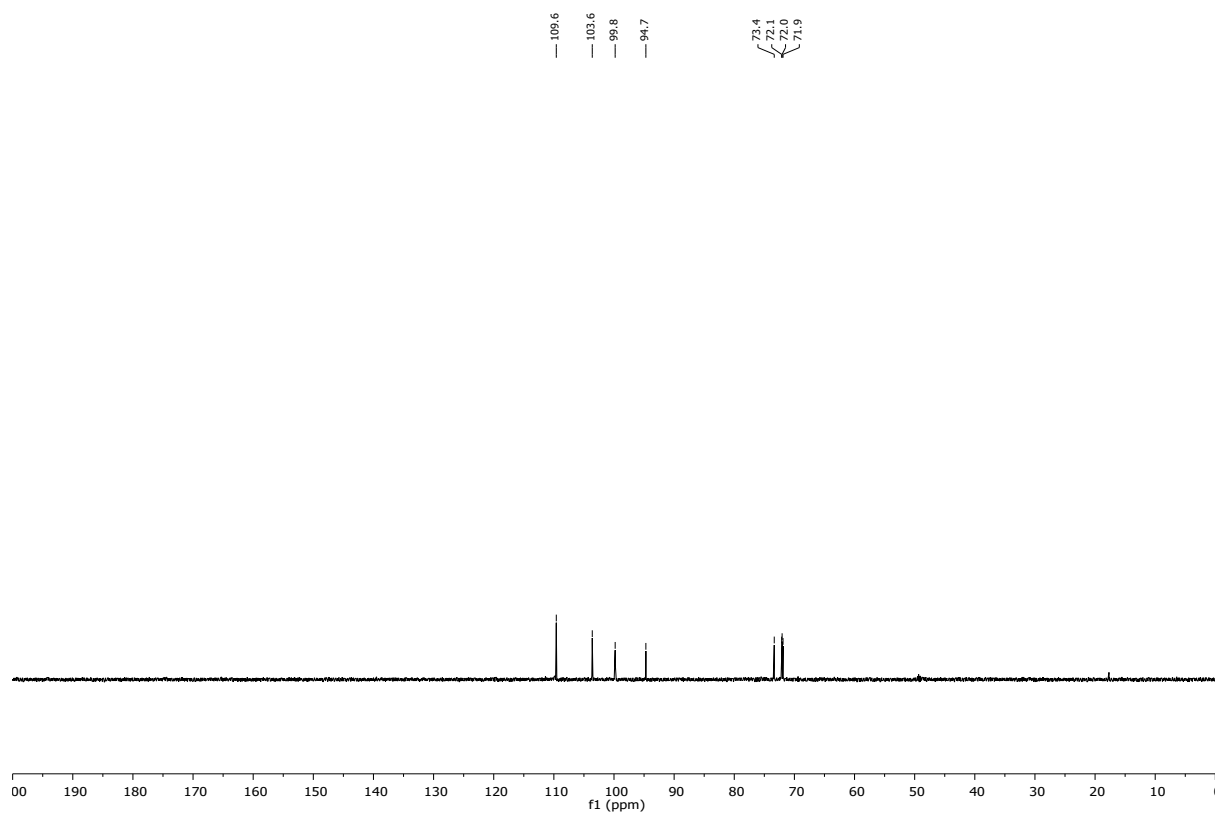

**Fig. S4:** DEPT-90 of myricitrin (1) in MeOD.

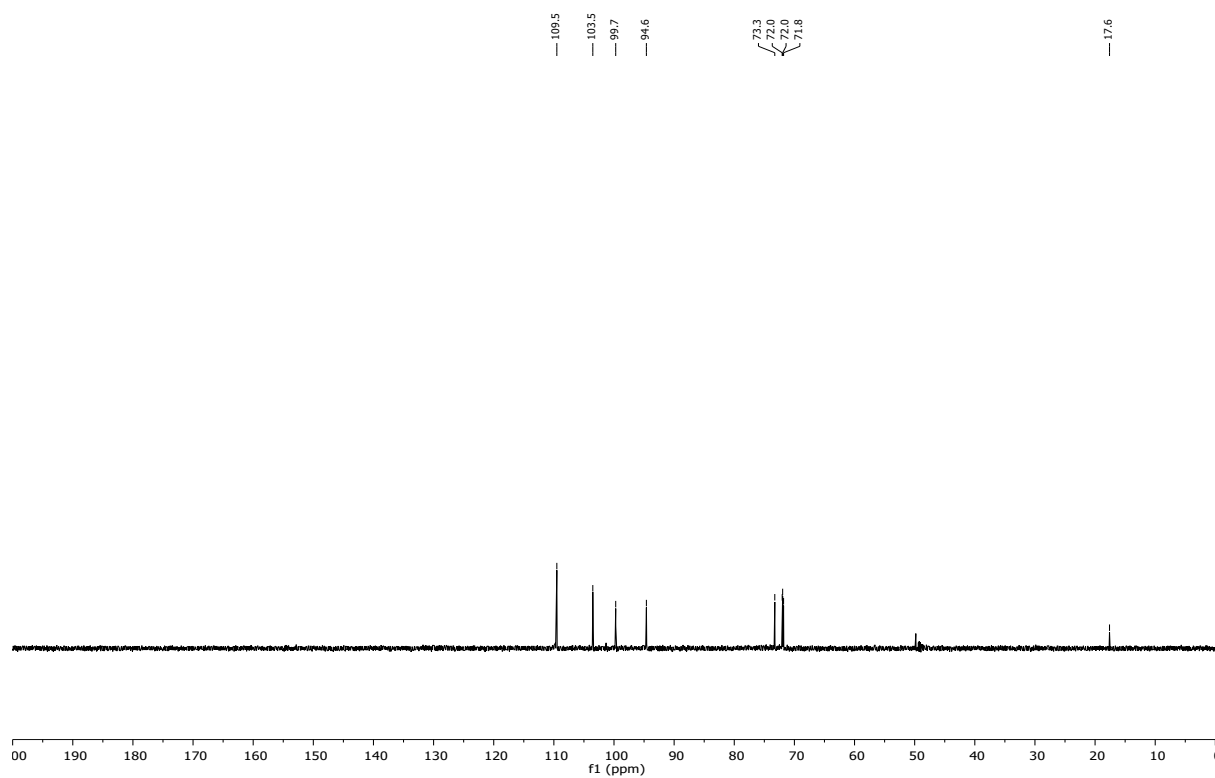

**Fig. S5:** DEPT-135 of myricitrin (1) in MeOD.

**Mearnsitrin (2):** (Mearncetin 3-*O*-rhamnoside)

UV,  $\lambda_{\text{max}}$  nm 257, 360;  $m/z$  333.0818  $[M-146+H]^+$ , 479.1370  $[M+H]^+$ , 501.1240  $[M+Na]^+$ ;  $^1\text{H-NMR}$  ( $\text{CD}_3\text{OD}$ ):  $\delta_{\text{H}}$  6.87 (2H, *s*, H-2', 6'), 6.37 (1H, *d*,  $J = 1.8$  Hz, H-8), 6.21 (1H, *d*,  $J = 1.8$  Hz, H-6), 5.31 (1H, *d*,  $J = 1.2$  Hz, H-1''), 4.23 (1H, *m*, H-2''), 3.88 (3H, *s*,  $-\text{OCH}_3$ ), 3.33-3.75 (3H, *m*, H-3'', H-4'', H-5''), 0.95 (3H, *d*, 5.4 Hz, H-6'');  $^{13}\text{C NMR}$  ( $\text{CD}_3\text{OD}$ ):  $\delta_{\text{C}}$  179.6 (C-4), 166.0 (C-7), 163.2 (C-5), 159.0 (C-2), 158.5 (C-9), 151.9 (C-3', 5'), 139.3 (C-4'), 136.7 (C-3), 127.0 (C-1'), 109.8 (C-2', 6'), 106.0 (C-10), 103.7 (C-1''), 99.9 (C-6), 94.7 (C-8), 73.2 (C-4''), 72.1 (C-5''), 72.0 (C-3''), 71.9 (C-2''), 60.9 (4'- $\text{OCH}_3$ ), 17.7 (C-6''). The compound was identified as mearnsitrin by comparing the data with those reported in the literature.<sup>3,4</sup>

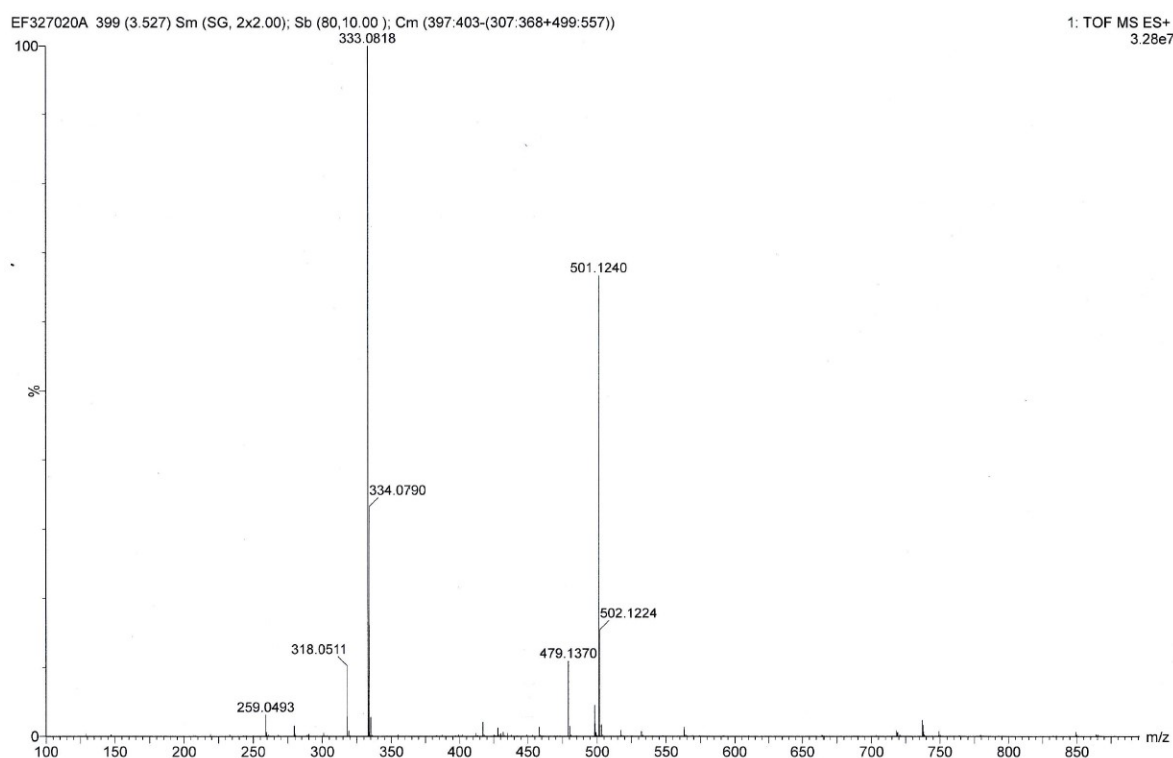

**Fig. S6:** ESI-MS (+ve) spectrum of mearnsitrin (2).

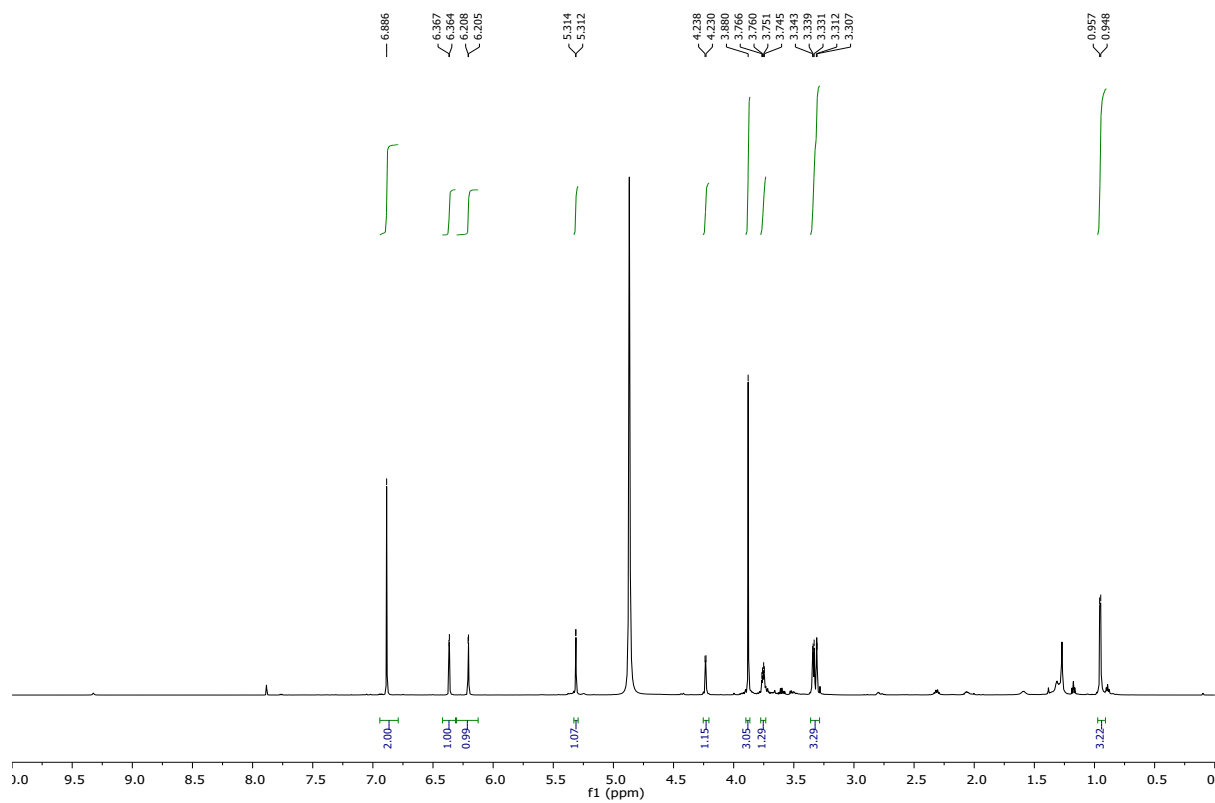

Fig. S7:  $^1\text{H}$ -NMR of mearnsitrin (**2**) in MeOD, 600 MHz.

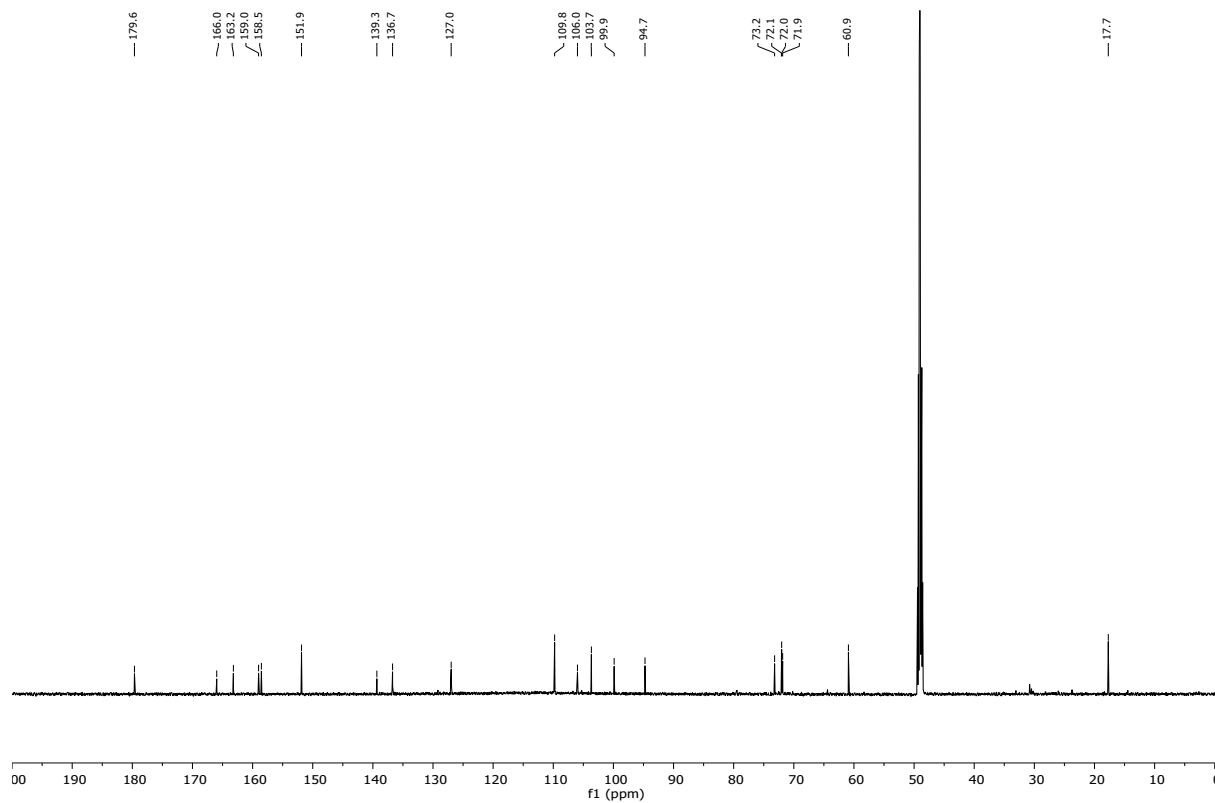

Fig. S8:  $^{13}\text{C}$ -NMR of mearnsitrin (**2**) in MeOD, 150 MHz.

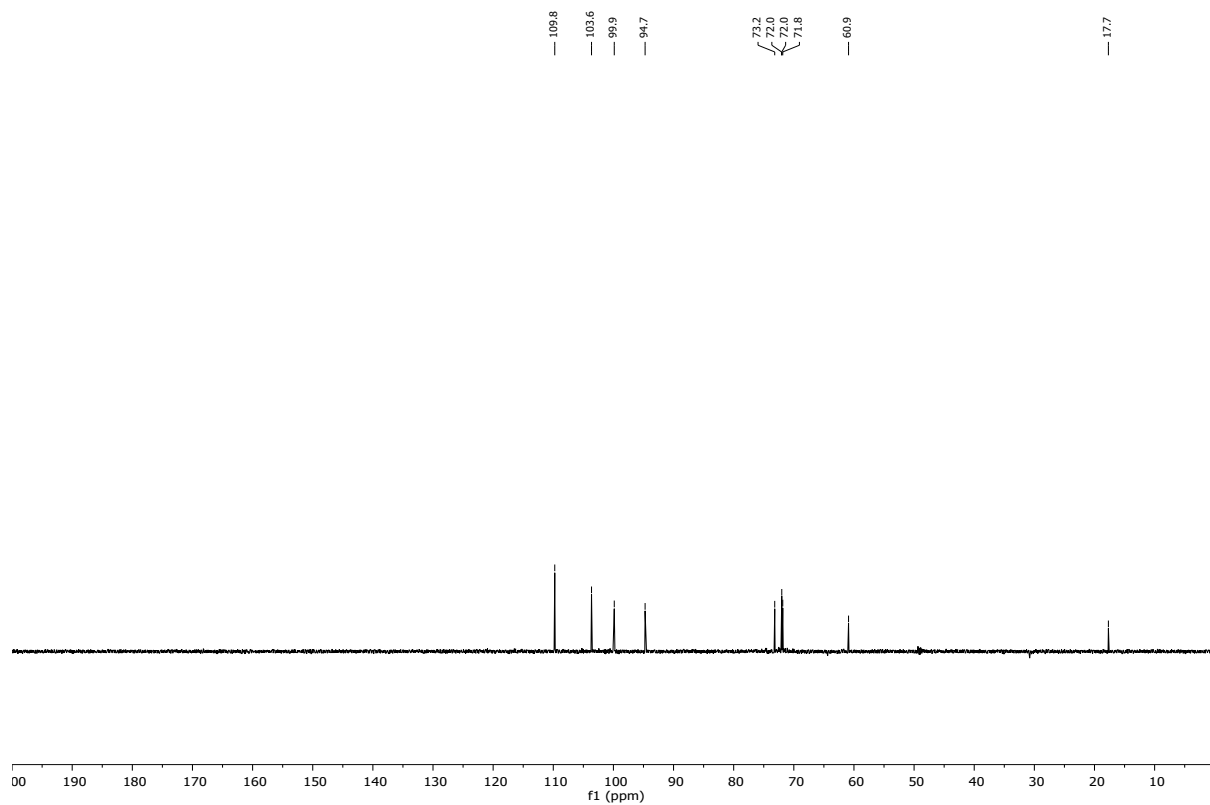

**Fig. S9:** DEPT-135 of mearnsitrin (**2**) in MeOD.

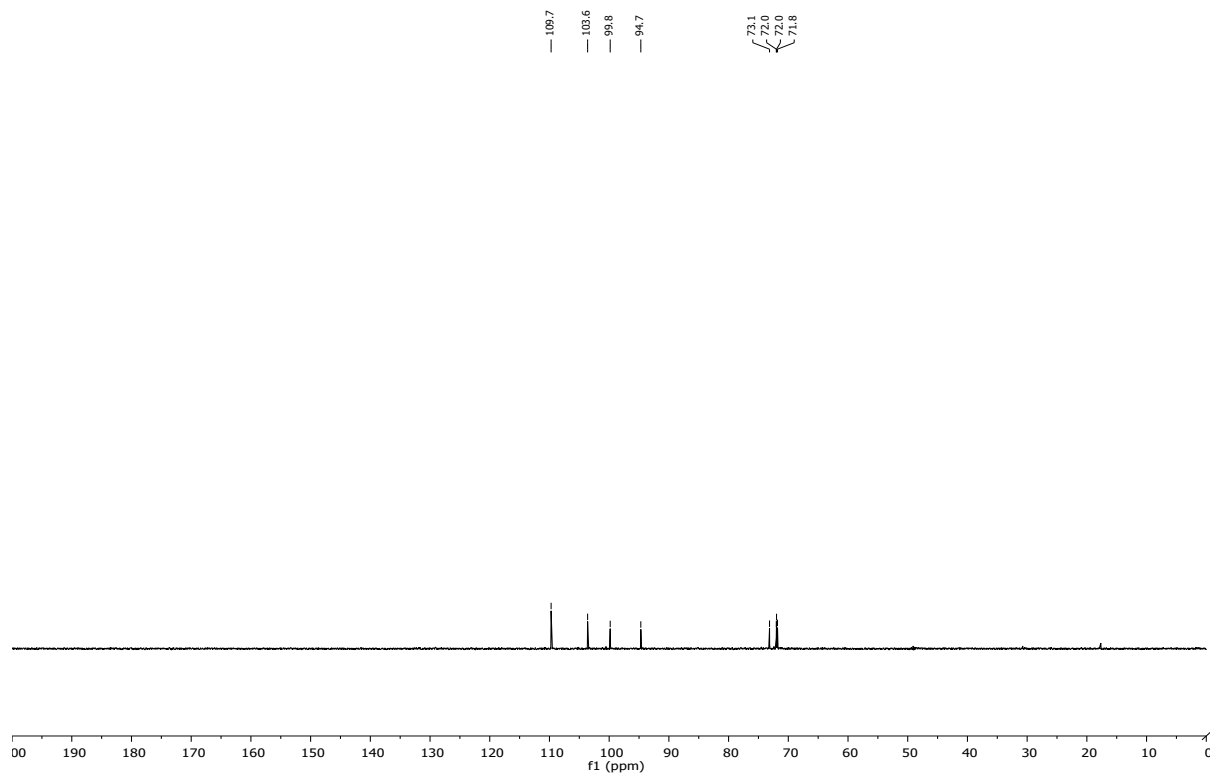

**Fig. S10:** DEPT-90 of mearnsitrin (**2**) in MeOD.

### **Mearnsetin (3)**

UV,  $\lambda_{\text{max}}$  nm 257, 360;  $m/z$  333.0615  $[M+H]^+$ ;  $^1\text{H-NMR}$  ( $\text{CD}_3\text{OD}$ ),  $\delta_{\text{H}}$  7.32 (2H, *s*, C-2', 6'), 6.40 (1H, *brs*, C-8), 6.21 (1H, *brs*, C-6), 3.90 (3H, *s*,  $-\text{OCH}_3$ );  $^{13}\text{C NMR}$  ( $\text{CD}_3\text{OD}$ ):  $\delta_{\text{C}}$  177.5 (C-4), 165.8 (C-7), 162.5 (C-5), 158.2 (C-9), 151.6 (C-3', 5'), 147.0 (C-2), 138.5 (C-3), 138.1 (C-4'), 128.0 (C-1'), 108.6 (C-2', 6'), 104.5 (C-10), 99.3 (C-6), 94.4 (C-8), 60.8 ( $-\text{OCH}_3$ ). The compound was identified as mearnsetin by comparing the data with those reported in the literature.<sup>3,5</sup>

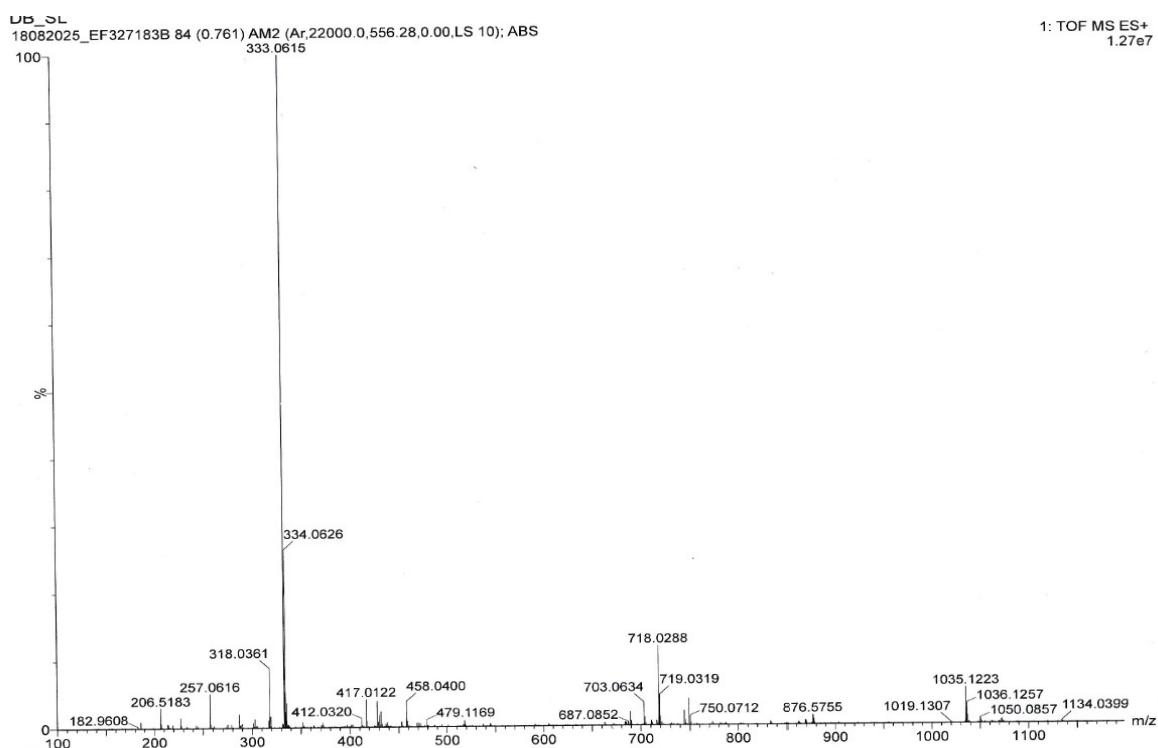

**Fig. S11:** ESI-MS (+ve) spectrum of mearnsetin (3).



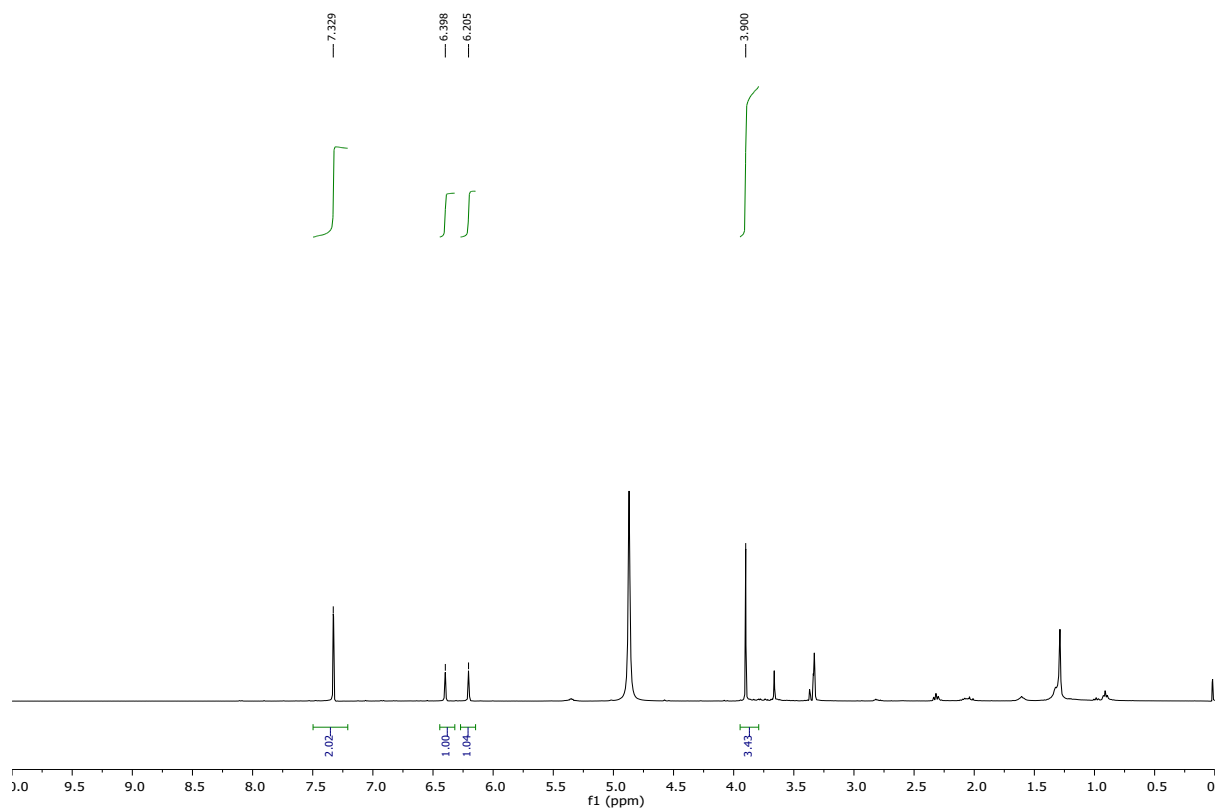

**Fig. S12:**  $^1\text{H}$ -NMR of mearnsetin (**3**) in MeOD, 600 MHz.

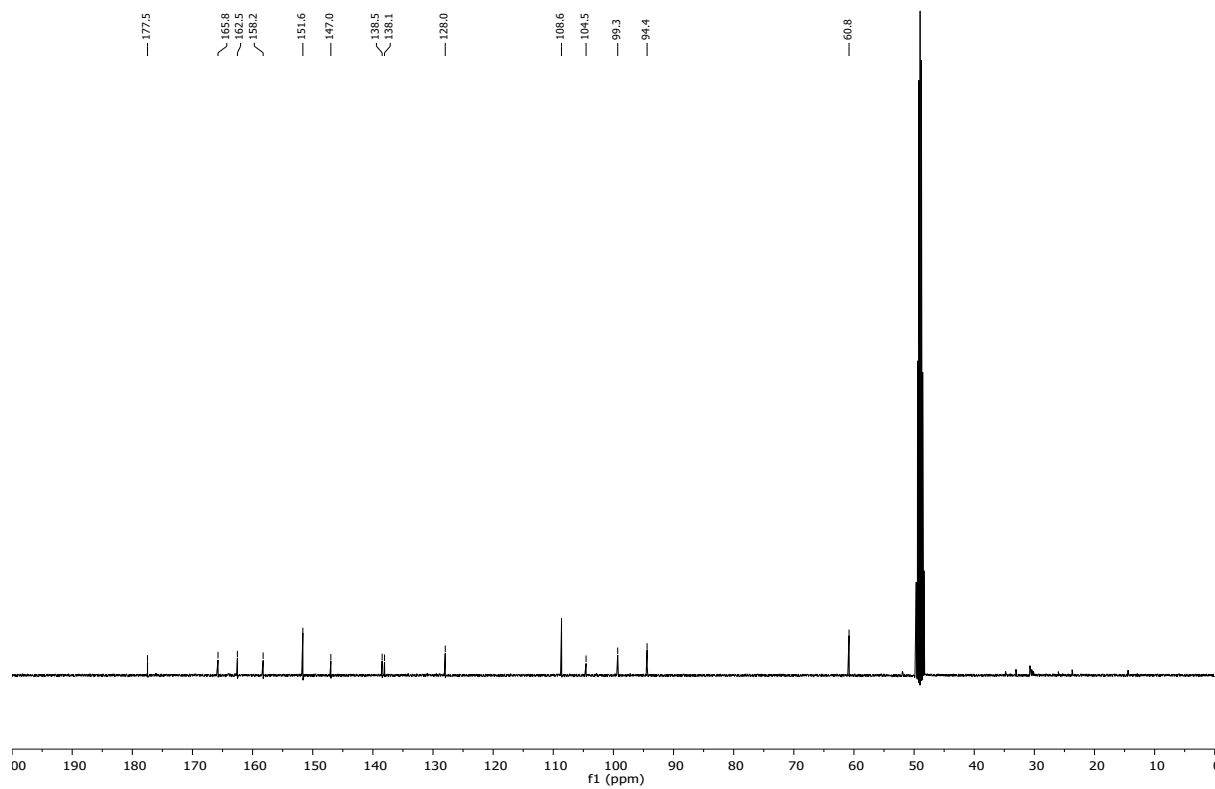

**Fig. S13:**  $^{13}\text{C}$ -NMR of mearnsetin (**3**) in MeOD, 150 MHz.

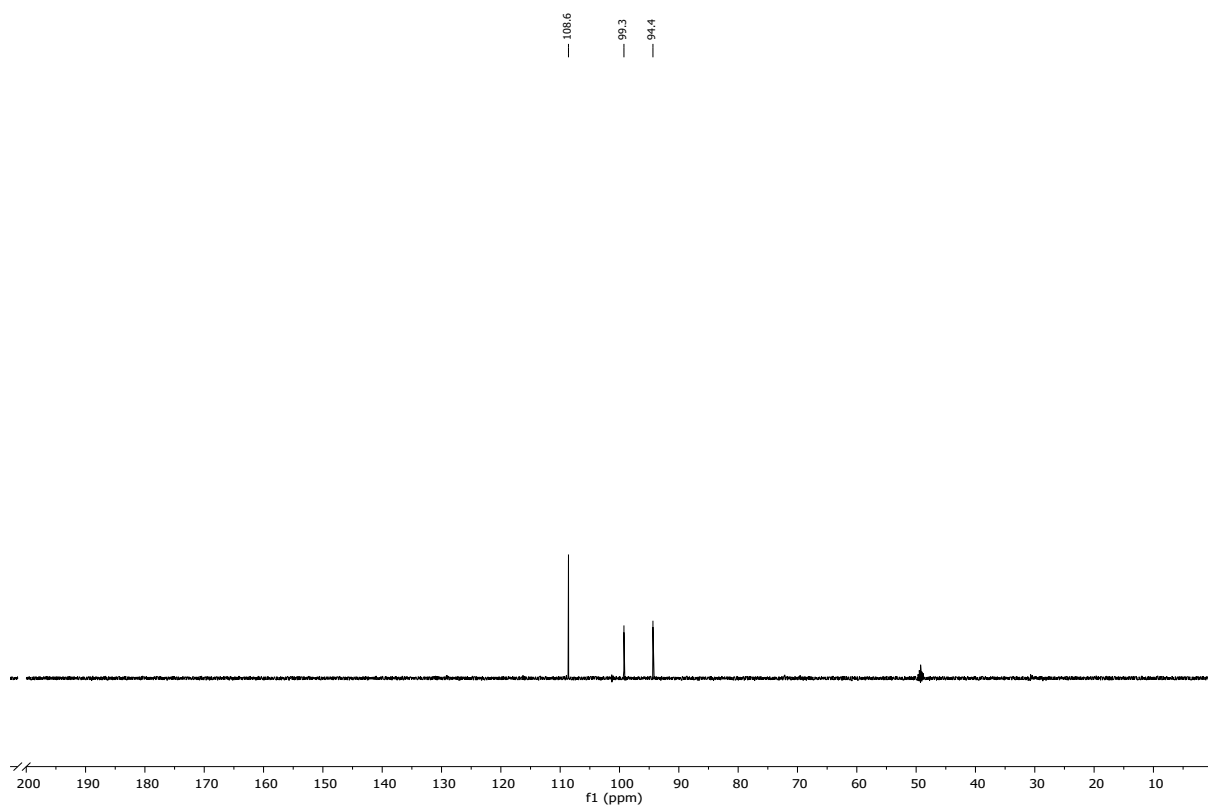

**Fig. S14:** DEPT-90 of mearnsetin (**3**) in MeOD.

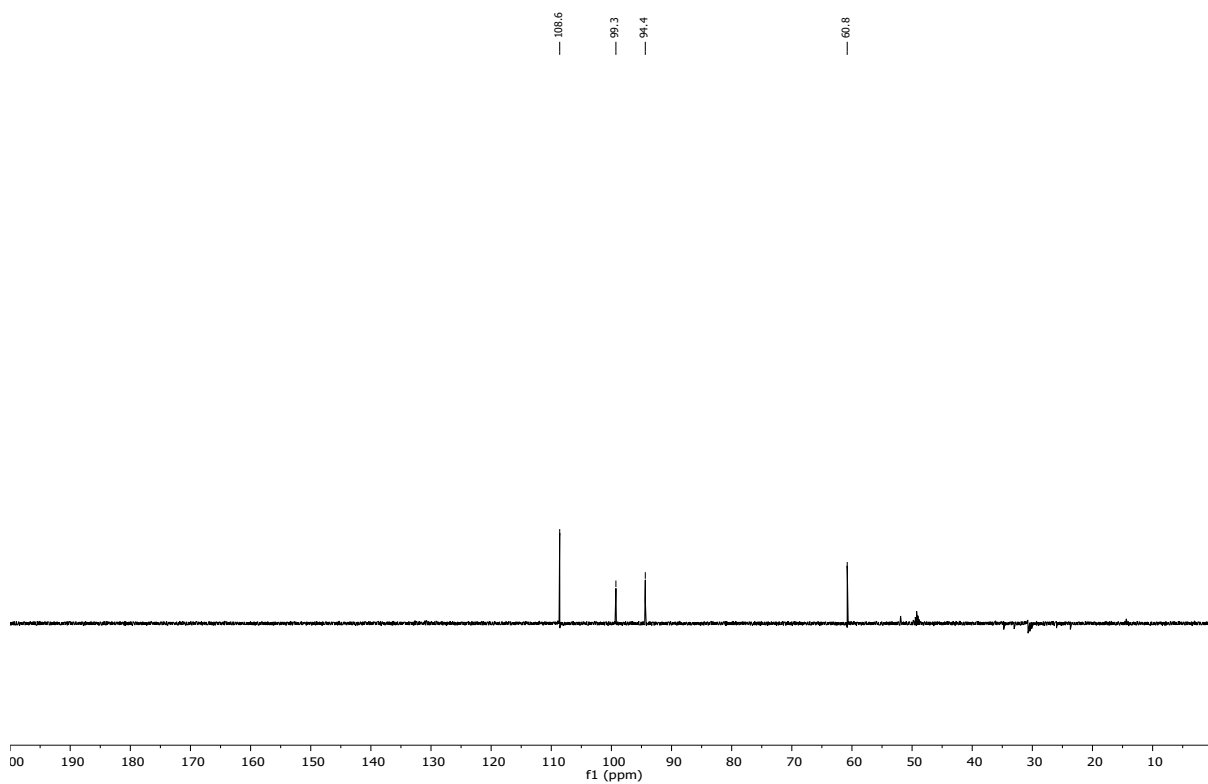

**Fig. S15:** DEPT-135 of mearnsetin (**3**) in MeOD.

### Myricetin (4)

UV,  $\lambda_{\text{max}}$  nm 257, 360;  $m/z$  319.0426  $[M+H]^+$ ;  $^1\text{H-NMR}$  ( $\text{CD}_3\text{OD}$ ),  $\delta_{\text{H}}$  7.36 (2H, *s*, H-2', H-6'), 6.39 (1H, *d*,  $J = 2$  Hz, H-8), 6.19 (1H, *d*,  $J = 2$  Hz, H-6);  $^{13}\text{C NMR}$  ( $\text{CD}_3\text{OD}$ ):  $\delta_{\text{C}}$  177.2 (C-4), 165.5 (C-7), 162.4 (C-5), 158.1 (C-9), 147.9 (C-2), 146.7 (C-3', C-5'), 137.3 (C-4'), 136.9 (C-3), 123.1 (C-1'), 108.5 (C-2', C-6'), 104.5 (C10), 99.2 (C6), 94.3 (C8). The compound was identified as myricetin by comparing the data with those of reported in the literature.<sup>2</sup>

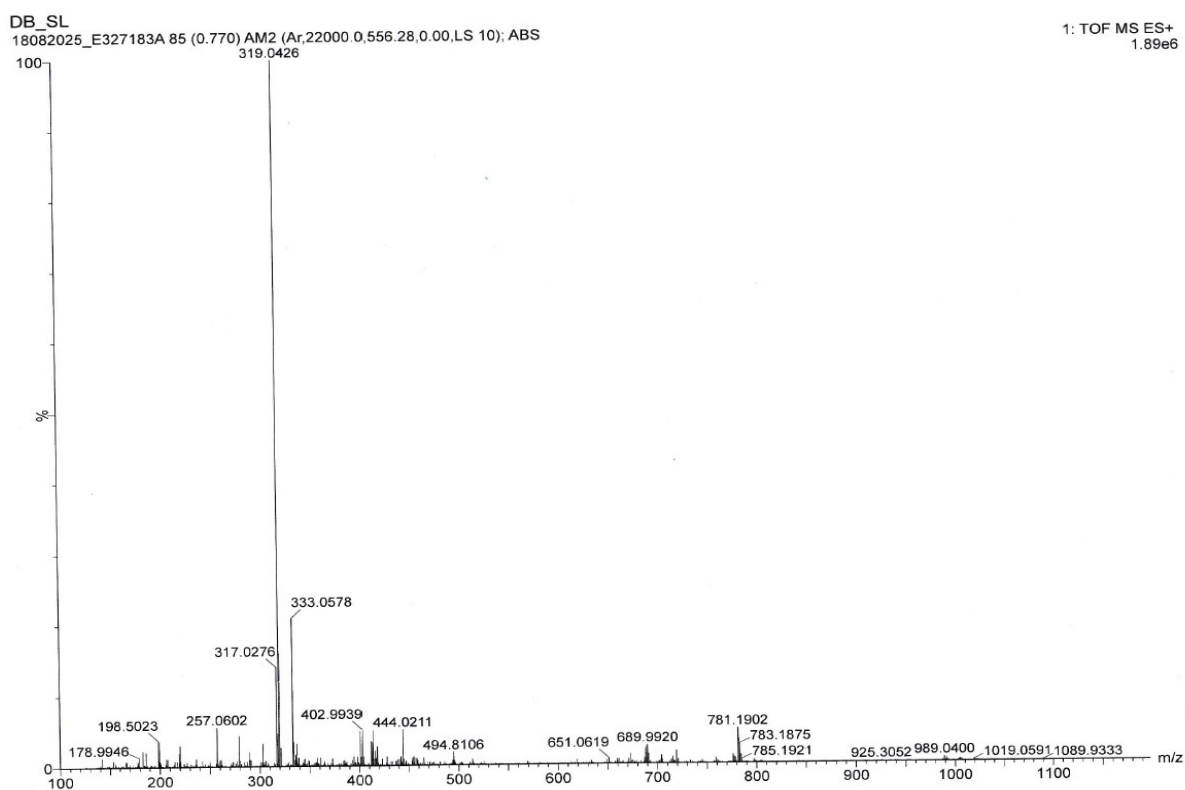

**Fig. S16:** ESI-MS (+ve) spectrum of myricetin (4).

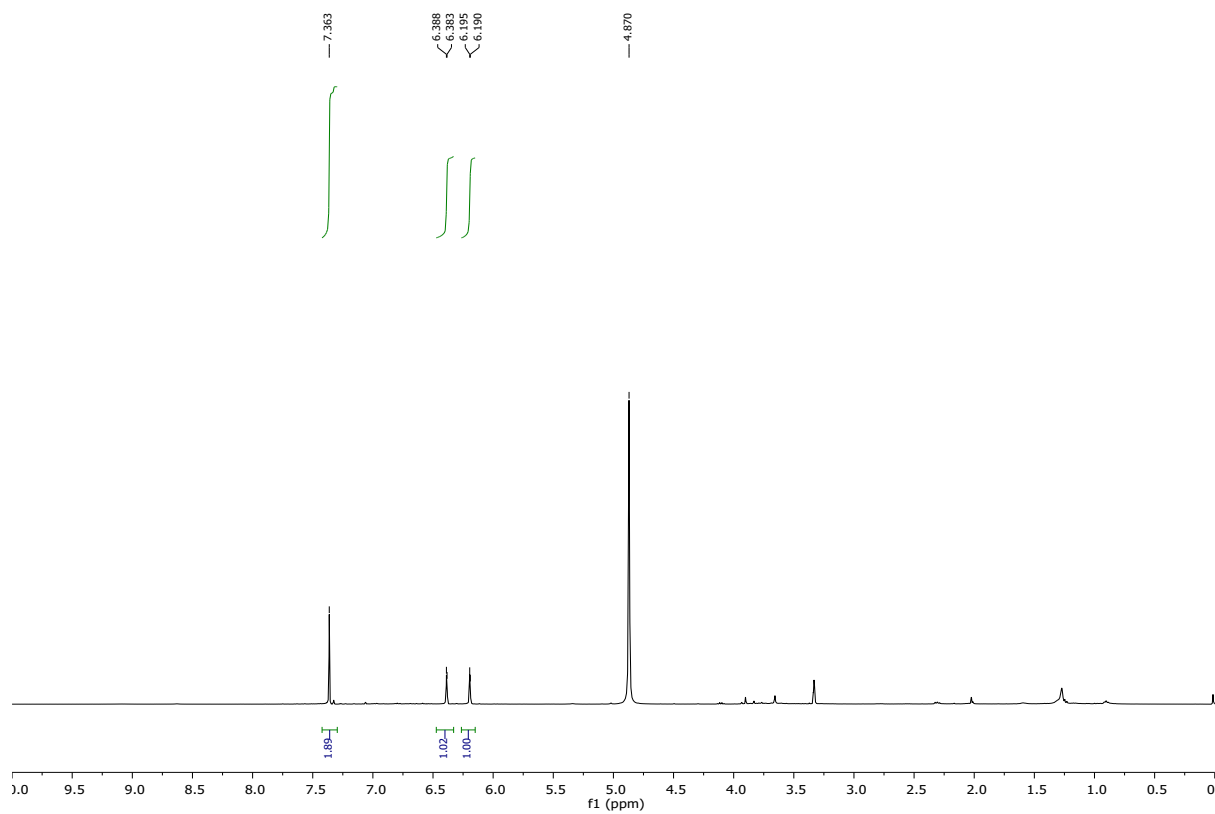

**Fig. S17:**  $^1\text{H}$ -NMR of myricetin (**4**) in MeOD, 600 MHz.

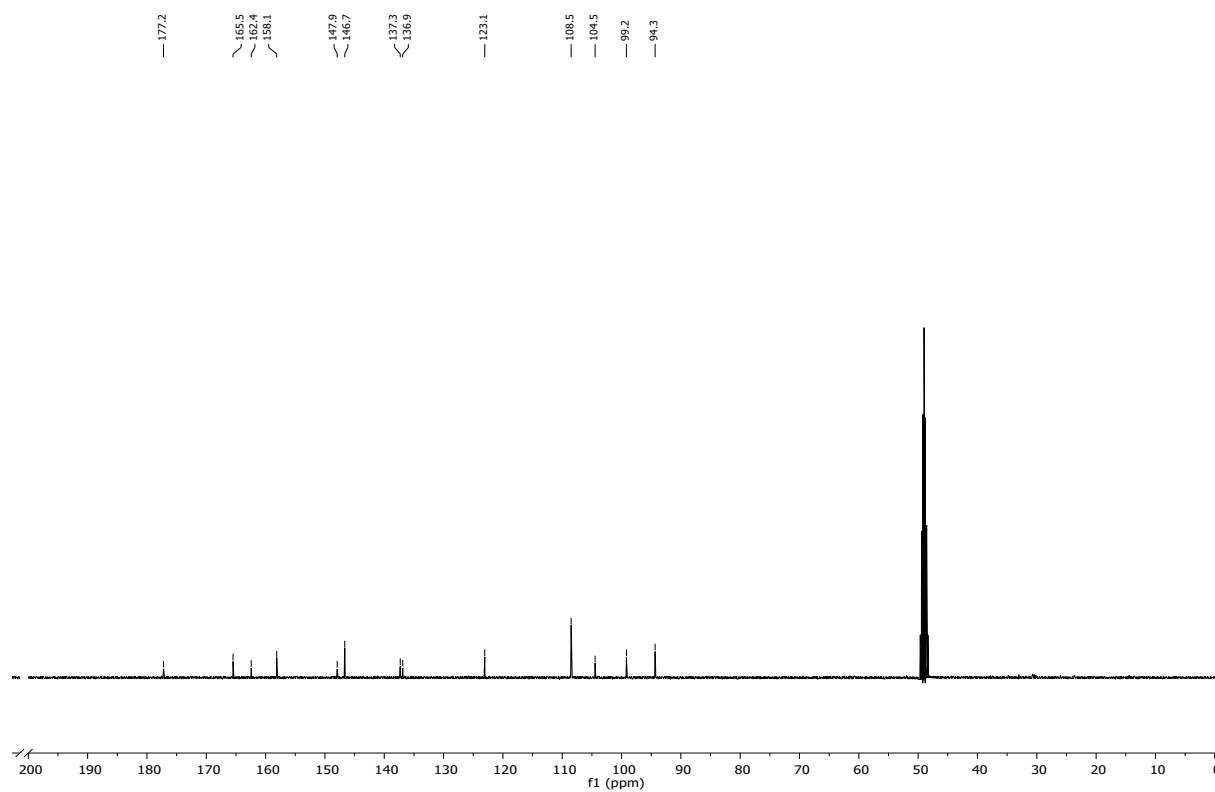

**Fig. S18:**  $^{13}\text{C}$ -NMR of myricetin (**4**) in MeOD, 150 MHz.

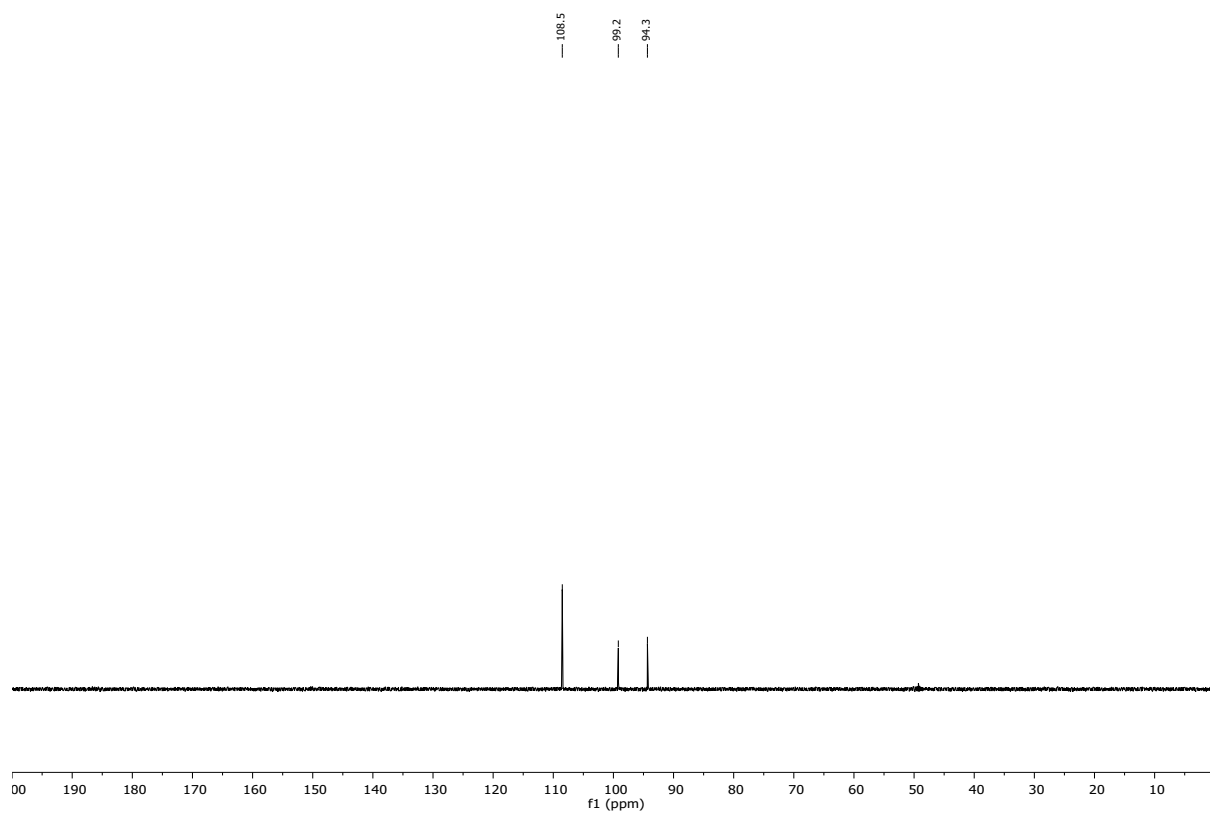

**Fig. S19:** DEPT-135 of myricetin (4) in MeOD.

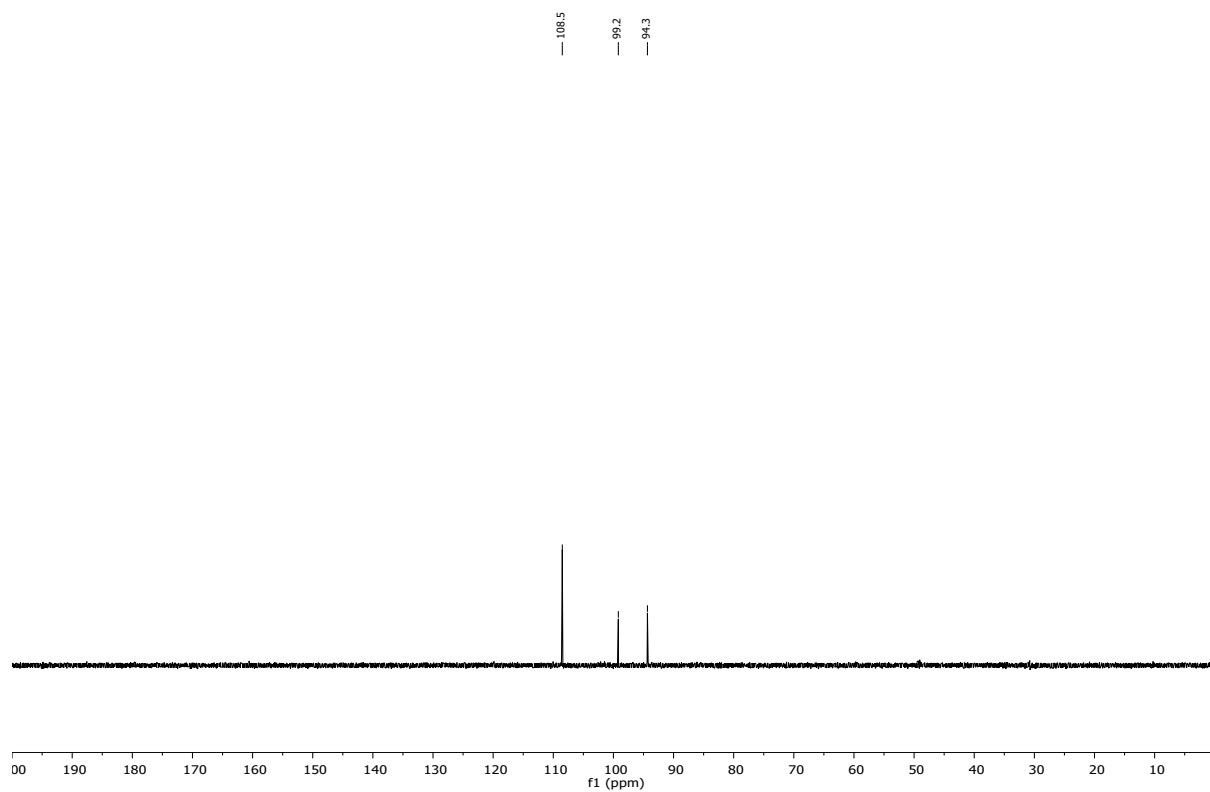

**Fig. S20:** DEPT-90 of myricetin (4) in MeOD.

## References

1. I. W. Hwang and S. K. Chung, Isolation and Identification of Myricitrin, an Antioxidant Flavonoid, from *Daebong Persimmon Peel*, *Prev Nutr Food Sci*, 2018, **23**, 341-346.
2. S. Y. Mok and S. Lee, Identification of flavonoids and flavonoid rhamnosides from *Rhododendron mucronulatum* for. albiflorum and their inhibitory activities against aldose reductase, *Food Chem*, 2013, **136**, 969-974.
3. K. Gluchoff-Fiasson, B. Fenet, J. C. Leclerc, J. Reynaud, M. Lussignol and M. Jay, Three new flavonol malonylrhamnosides from *Ribes alpinum*, *Chem Pharm Bull (Tokyo)*, 2001, **49**, 768-770.
4. Y. Noreen, G. Serrano, P. Perera and L. Bohlin, Flavan-3-ols isolated from some medicinal plants inhibiting COX-1 and COX-2 catalysed prostaglandin biosynthesis, *Planta Med*, 1998, **64**, 520-524.
5. A. O. Oladimeji, I. A. Oladosu, M. S. Ali and Z. Ahmed, Flavonoids from the roots of *Dioclea reflexa* (Hook F.), *Bulletin of The Chemical Society of Ethiopia*, 2015, **29**, 441-448.
